# Supplementary material for: Direct growth of an economic green energy storage material: a monocrystalline jarosite-KFe3(SO4)2(OH)6-nanoplates@rGO hybrid as a superior lithium-ion battery cathode
Source: Royal Society of Chemistry journal article supplement (doi:10.1039/c5ta10622b), 2016-01-01
Supplement: c5ta10622b1.pdf [file c5ta10622b1.pdf]

## Electronic Supplementary Information

### **Direct Growth of Economic Green Energy Storage Material: Monocrystalline Jarosite- $\text{KFe}_3(\text{SO}_4)_2(\text{OH})_6$ -Nanoplates@rGO Hybrid as Superior Lithium-Ion Battery Cathode**

Wangwang Xu<sup>a</sup>, Zhiqiang Xie<sup>a</sup>, Xiaodan Cui<sup>a</sup>, Kangning Zhao<sup>b</sup>, Lei Zhang<sup>b</sup>, Liqiang Mai<sup>b</sup>, Ying Wang<sup>a\*</sup>

a. Department of Mechanical & Industrial Engineering, Louisiana State University, Baton Rouge, LA 70803, USA.

b. State Key Laboratory of Advanced Technology for Materials Synthesis and Processing, Wuhan University of Technology, Wuhan 430070, China.

\*Corresponding Authors:

Prof. Ying Wang, Tel: 001-225-578-8577; Fax: 001-225-578-9162; E-mail: ywang@lsu.edu

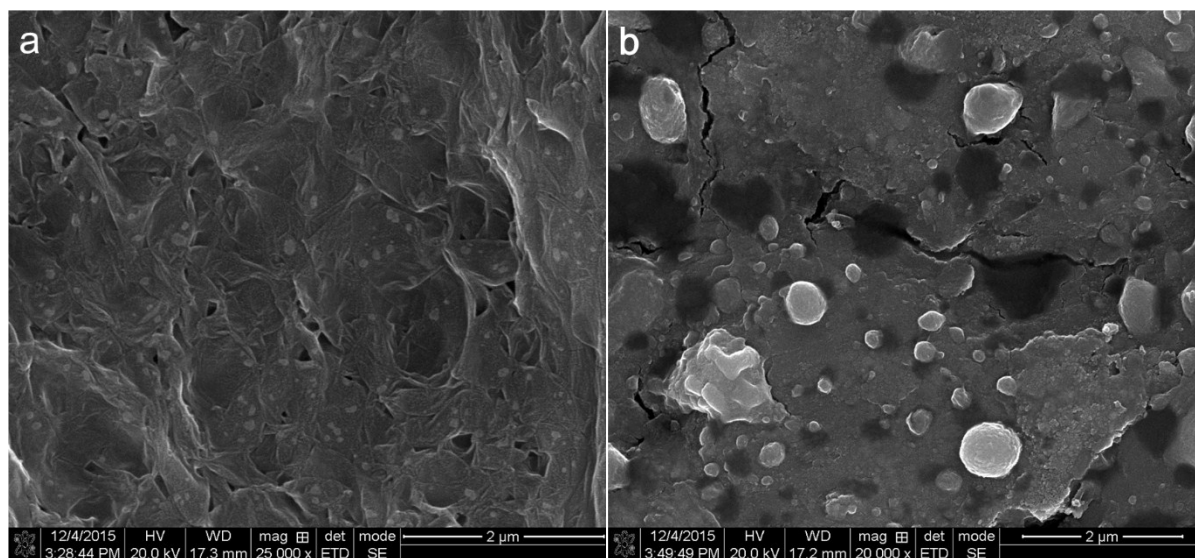

**Figure S1.** Nucleated  $\text{KFe}_3(\text{SO}_4)_2(\text{OH})_6$  nanoparticles on graphene nanosheets after (a) 3 hours of reaction, and (b) 5 hours of reaction.
